# Supplementary material for: The Effect of 12 Weeks of High Intensity Functional Training (HIFT) on Serum Mitokine and Metabolic Risk Factors in Patients with Metabolic Syndrome: A Randomized Control Trial
Source: Research Square preprint supplement (doi:10.21203/rs.3.rs-8220619/v1), 2026-01-12
Supplement: Supplementary file 1 [file 31d6b3ef38a73281630cdba2.pdf]

status ×BMC ×IRCT ×erp.ai ×conur ×10611 ×(9) Sy ×Sport ×دانشگ ×هویت ×

←→↻irct.behdasht.gov.ir/trial/80642

☆🗨️🔍👤

IRCTIranian Registry of Clinical Trials - Beta version

HomeSearch trialsHelpLoginApply for membership

Home / Approved trialsفارسی

Protocol summaryGeneral informationSecondary IdsEthics committeesHealth conditions studiedPrimary outcomesSecondary outcomesIntervention groupsRecruitment centersSponsors / Funding sourcesPerson responsible for general inquiriesPerson responsible for scientific inquiriesPerson responsible for updating dataSharing plan

The effects of 12 weeks of high intensity functional training (HIFT) and Moderate intensity functional training (MIFT) on serum mitokine levels in metabolic syndrome patients

More options

Protocol summary

|                      |                                                                                                                                                                                                                        |
|----------------------|------------------------------------------------------------------------------------------------------------------------------------------------------------------------------------------------------------------------|
| Study aim            | Investigating the Effect of 12 Weeks of HIFT and MIFT Training on Cytokine Levels in Patients with Metabolic Syndrome                                                                                                  |
| Design               | The participants were randomly assigned to three groups: HIFT training, MIFT training, and control. Each group consisted of 12 participants, including the control and the two intervention groups.                    |
| Settings and conduct | The study involved men aged 35 to 55 with metabolic syndrome in Tehran. Participants were randomly assigned to either the experimental group (12-week HIFT and MIFT program) or the control group. Before the program, |

IRCT | The effects of 12 weeks of ×

←↻https://irct.behdasht.gov.ir/trial/80642

A🔍👤

Protocol summaryGeneral informationSecondary IdsEthics committeesHealth conditions studiedPrimary outcomesSecondary outcomesIntervention groupsRecruitment centersSponsors / Funding sourcesPerson responsible for general inquiriesPerson responsible for scientific inquiriesPerson responsible for updating dataSharing plan

General information

|                               |                                                                                                                                                                                                                                                                                                                                                 |      |                  |                               |                                             |         |                            |       |                  |               |                            |
|-------------------------------|-------------------------------------------------------------------------------------------------------------------------------------------------------------------------------------------------------------------------------------------------------------------------------------------------------------------------------------------------|------|------------------|-------------------------------|---------------------------------------------|---------|----------------------------|-------|------------------|---------------|----------------------------|
| Reason for update             |                                                                                                                                                                                                                                                                                                                                                 |      |                  |                               |                                             |         |                            |       |                  |               |                            |
| Acronym                       |                                                                                                                                                                                                                                                                                                                                                 |      |                  |                               |                                             |         |                            |       |                  |               |                            |
| IRCT registration information | IRCT registration number: <b>IRCT20241130063899N1</b><br>Registration date: <b>2025-11-01, 1404/08/10</b><br>Registration timing: <b>registered_while_recruiting</b><br>Last update: <b>2025-11-01, 1404/08/10</b><br>Update count: <b>0</b>                                                                                                    |      |                  |                               |                                             |         |                            |       |                  |               |                            |
| Registration date             | 2025-11-01, 1404/08/10                                                                                                                                                                                                                                                                                                                          |      |                  |                               |                                             |         |                            |       |                  |               |                            |
| Registrant information        | <table><tr><td>Name</td><td>Mohammad Moayedi</td></tr><tr><td>Name of organization / entity</td><td>University of Allameh Tabataba i University</td></tr><tr><td>Country</td><td>Iran (Islamic Republic of)</td></tr><tr><td>Phone</td><td>+98 21 6586 2987</td></tr><tr><td>Email address</td><td>mohammad_moayedi@atu.ac.ir</td></tr></table> | Name | Mohammad Moayedi | Name of organization / entity | University of Allameh Tabataba i University | Country | Iran (Islamic Republic of) | Phone | +98 21 6586 2987 | Email address | mohammad_moayedi@atu.ac.ir |
| Name                          | Mohammad Moayedi                                                                                                                                                                                                                                                                                                                                |      |                  |                               |                                             |         |                            |       |                  |               |                            |
| Name of organization / entity | University of Allameh Tabataba i University                                                                                                                                                                                                                                                                                                     |      |                  |                               |                                             |         |                            |       |                  |               |                            |
| Country                       | Iran (Islamic Republic of)                                                                                                                                                                                                                                                                                                                      |      |                  |                               |                                             |         |                            |       |                  |               |                            |
| Phone                         | +98 21 6586 2987                                                                                                                                                                                                                                                                                                                                |      |                  |                               |                                             |         |                            |       |                  |               |                            |
| Email address                 | mohammad_moayedi@atu.ac.ir                                                                                                                                                                                                                                                                                                                      |      |                  |                               |                                             |         |                            |       |                  |               |                            |
| Recruitment status            | Recruitment complete                                                                                                                                                                                                                                                                                                                            |      |                  |                               |                                             |         |                            |       |                  |               |                            |
